# Supplementary material for: Chemically presodiated Sb with a fluoride-rich interphase as a cycle-stable anode for high-energy sodium ion batteries
Source: Royal Society of Chemistry journal article supplement (doi:10.1039/d0ta10880d), 2021-01-01
Supplement: d0ta10880d1.pdf [file d0ta10880d1.pdf]

## Supporting Information

# Chemically Presodiated Sb with Fluoride-rich Interphase as a Cycle-stable Anode for High-energy Sodium Ion Batteries

*Mengchuang Liu<sup>‡</sup>, Zezhou Yang<sup>‡</sup>, Yifei Shen, Shuhan Guo, Junyao Zhang, Xinping Ai, Hanxi Yang, Jiangfeng Qian\**

Hubei Key Laboratory of Electrochemical Power Sources, College of Chemistry and Molecular Sciences, Wuhan University, Wuhan, Hubei 430072, China

\*E-mail: jfqian@whu.edu.cn;

<sup>‡</sup> These authors contributed equally to this work.

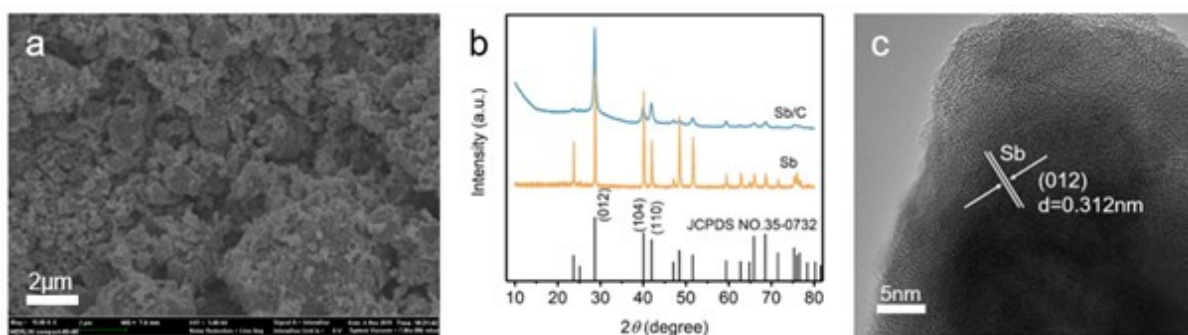

**Fig. S1.** Structural and morphological characterization of Sb/C sample: (a) SEM image (b) XRD pattern. (c) HR-TEM image.

Sb/C nanocomposites are prepared by mixing commercial Sb powder and super-p carbon materials using simple one-step ball milling method (for experimental details, see supporting information). The SEM image (**Fig.S1a**) shows the morphology of the sample, which is composed of several hundred nanometers ( $\sim 300$  nm) of irregular aggregates. The XRD pattern of the as prepared sample is shown in Figure S1b. All diffraction patterns well matched with rhombohedral phase of Sb (JCPDS no. 35-0732) and the broadened diffraction peaks are indicative of the nanosized feature of Sb after ball milling<sup>1</sup>. Further, high-resolution TEM image (**Fig.S1c**) more intuitively reveals Sb/C nanocomposite structural characteristics. The lattice fringes with spacing of 0.312 nm corresponding well to the (012) plane of hexagonal Sb crystal plane diffraction.<sup>1-3</sup>

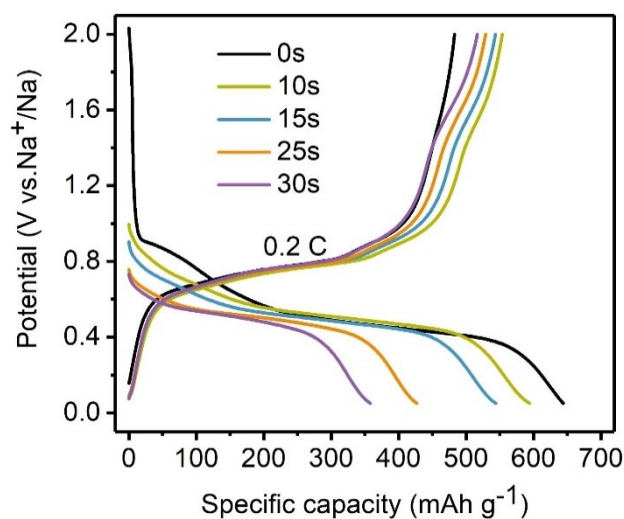

**Fig. S2.** The initial charging-discharging curve of the presodiated Sb/C electrodes (0, 10, 15, 25, and 30 s) at 0.2 C (1C=500 mA/g).

It is noteworthy that, compared to the non-sodiated sample (0s), the presodiated Sb samples (10-30 s) deliver slightly higher charge (Na-extraction) capacities. However, the specific charge capacities decrease as the presodiation time increasing (**Fig. S2**), which is attributed to the drastic volume expansion and pulverization of the  $\text{Na}_x\text{Sb}$  alloy during the over-presodiation process. Besides, the over-sodiated Sb anode will induce massive electrolyte decomposition, resulting in a large impedance forms at the electrode/electrolyte interface, and thus a capacity decay with the prolonged sodiation time. Therefore, the presodiation time is optimized to be 15s, and the resultant  $\text{Na}_x\text{Sb}$  anode reached a high ICE of  $\sim 100\%$  with reversible capacity of  $540 \text{ mAh g}^{-1}$ .

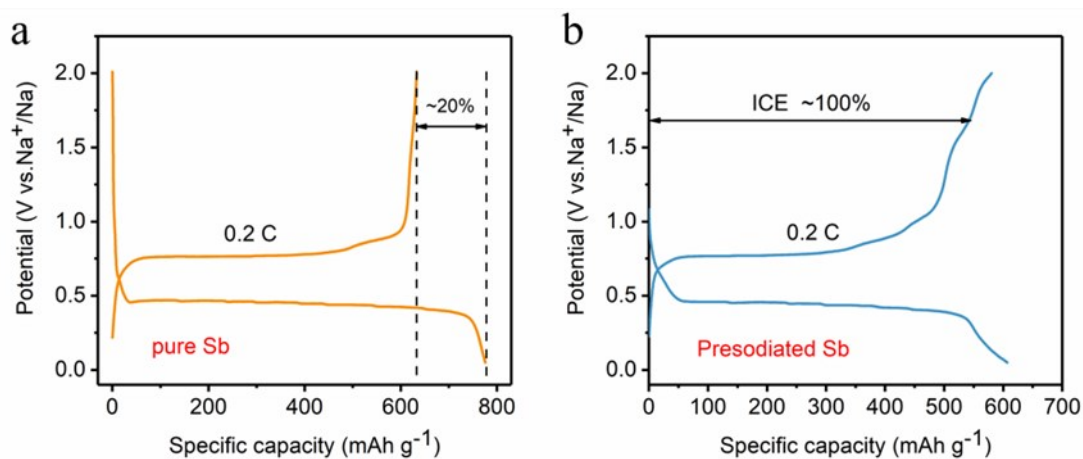

**Fig. S3.** The first cycle charge-discharge curves of pure Sb and presodiated pure Sb electrodes cycled at 0.2 C rate (1C=500 mA g<sup>-1</sup>).

In order to exclude the interference of carbon components, we conducted control tests on pure Sb powder. As shown in **Fig. S3**, the pure Sb electrode shows a low initial coulombic efficiency of ~80% in the first cycle, which was elevated to nearly 100% after presodiation treatment for 15s. These results undoubtedly demonstrate the effectiveness of our presodiation strategy to Sb alloying anode.

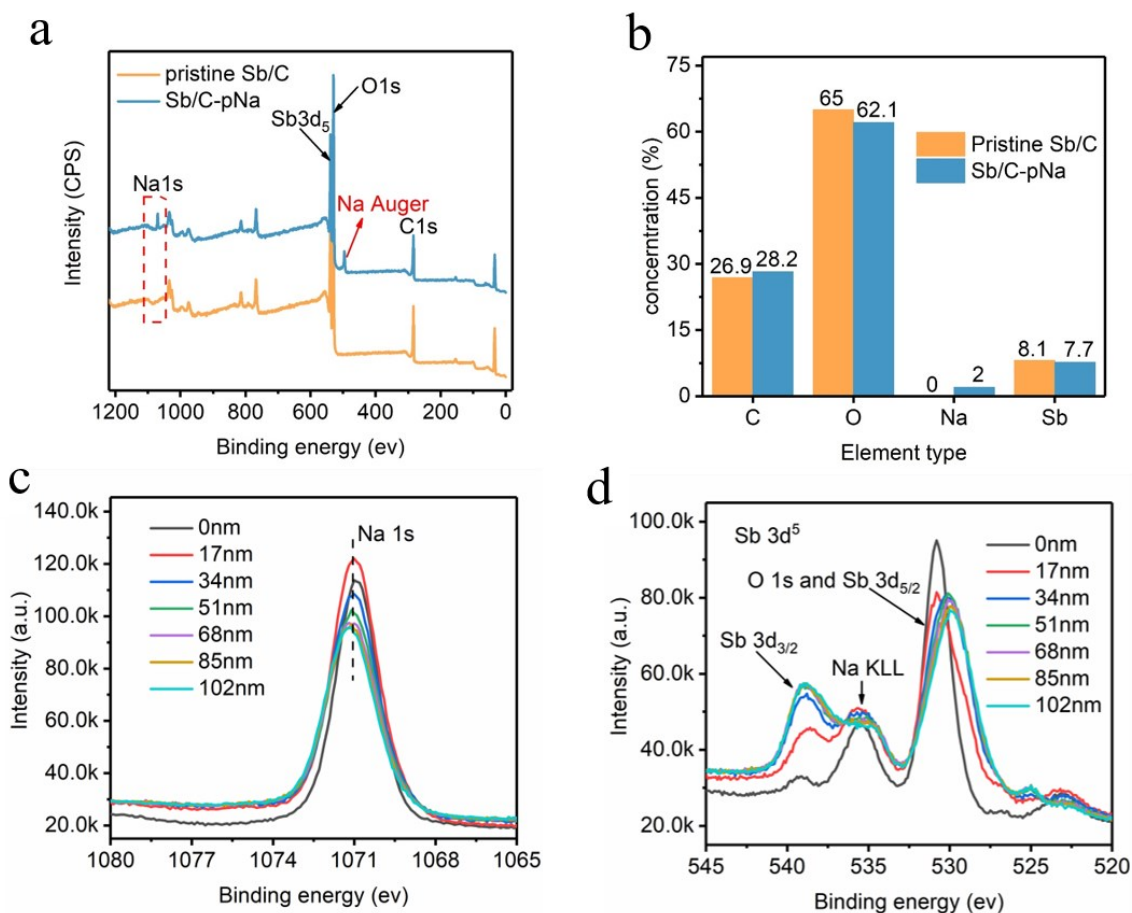

**Fig. S4.** XPS characterization of the pristine Sb and presodiated Sb-pNa materials: (a) XPS full spectrum and (b) atomic ratio of elements. (c-d) XPS depth profiling on the presodiated Sb-pNa electrode as a function of the etching thickness. (c) Na 1s spectrum and (d) Sb 3d5 spectrum. The Ar-ion etching rate is about 17.12 nm/min based on the calibration of SiO<sub>2</sub>.

XPS measurements interlaced with Ar-ion etching was conducted to evaluate the reaction depth within the Sb particle after presodiation treatment. The etching rate is about 17.12 nm/min based on the calibration of SiO<sub>2</sub>. As seen in **Fig. S4 c** and **d**, after etching for ~102 nm (6 min), we can still observe pronounced Na signals element in Na1s and Sb 3d spectra. These results suggested that the chemical Na<sup>+</sup> pre-insertion reaction occurs to form homogeneous Na<sub>x</sub>Sb alloy (as illustrated in Fig. 1 in the main text), rather than merely surface reaction to generate a core-shell type Sb@Na<sub>x</sub>Sb composite.

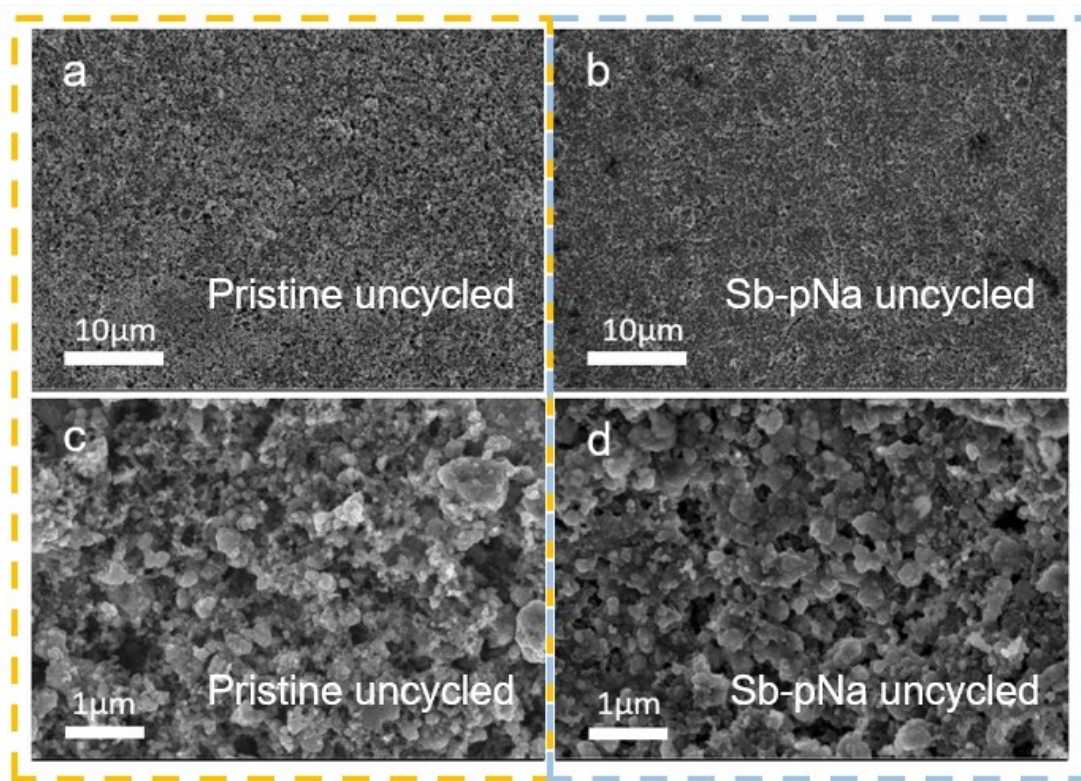

**Fig. S5.** SEM characterization on the unycled pristine Sb electrode and presodiated Sb-pNa electrode.

Scanning electron micrography (SEM) tests were conducted to reveal the structure and morphology changes after presodiation treatment. As shown in **Fig. S5**, the mean particle size of Sb-pNa powder (~400 nm) are larger than that of pristine Sb electrode (~300 nm), suggesting a volume expansion due to Na alloying reaction after presodiation treatment.

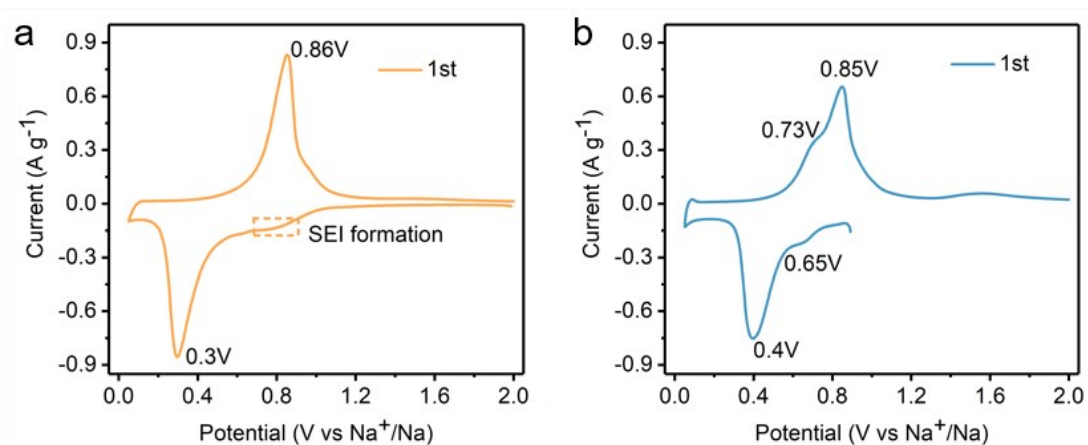

**Fig. S6.** Cyclic voltammetry curves of (a) pristine Sb electrode and (b) Sb-pNa electrode during the initial cycles at a scan rate of  $0.1 \text{ mV s}^{-1}$ .

**Fig. S6** compares the CV profiles of pristine Sb and presodiated Sb-pNa electrodes at a scan rate of  $0.1 \text{ mV/s}$  between  $0.05$  and  $2.0 \text{ V}$ . The pristine Sb electrode (**Fig. S6a**) displays a broad irreversible peak at  $\sim 0.8 \text{ V}$  in the first cathodic scan owing to electrolyte decomposition to form SEI layer. The subsequent  $0.3 \text{ V}$  cathodic and  $0.86 \text{ V}$  anodic peaks correspond to  $\text{Na}^+$  alloying/dealloying reactions on Sb matrix ( $\text{Sb} \rightarrow \text{Na}_3\text{Sb}$ ).

Quite differently, the CV curve of Sb-pNa anode did not show the irreversible reduction peak due to the decomposition of electrolyte (**Fig. S6b**), suggesting that there exists an SEI layer already on Sb-pNa electrode. In addition, the Sb-pNa electrode exhibits a smaller peak separation between cathodic ( $0.4\text{V}$ ) and anodic ( $0.85\text{V}$ ) potentials, implying a faster electrochemical reaction kinetics than that of pristine Sb.

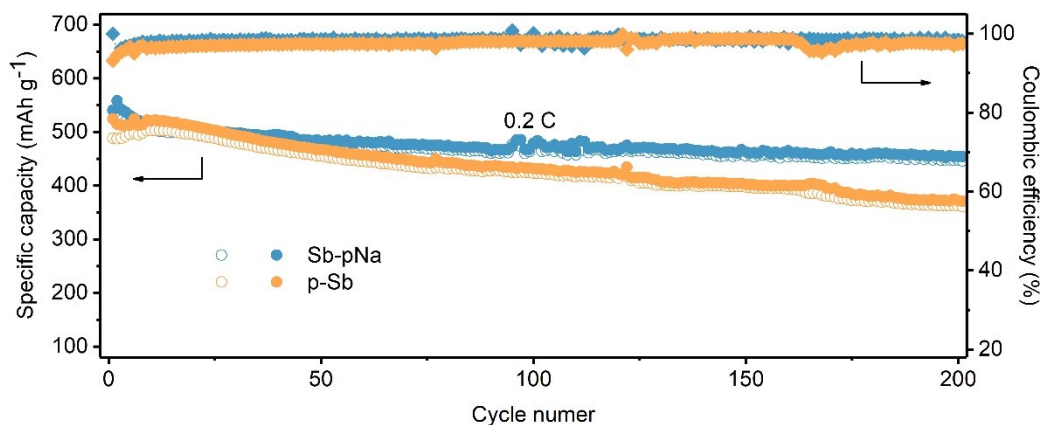

**Fig. S7.** Cycling performance and coulombic efficiencies of Na||Sb cell (a) and Na||Sb-pNa half cells at 0.2 C.

**Fig. S7** compares the cycling stability of pristine Sb and presodiated Sb-pNa electrodes cycled at a low rate of 0.2 C. The Sb-pNa shows a retention of 85 % after 200 cycles, whereas pristine Sb remains only 70% of its initial capacity over the same cycles. It should be pointed that the capacities fluctuations at about 100 cycles for the Sb-pNa electrode might be attributed to the fluctuation of the test temperature. In addition, the average coulombic efficiency of Sb-pNa anode over 200 cycles is ~98.4%, higher than that of ~97.9% for pristine Sb anode. These results suggest that the presodiation treatment can effectively suppress the growth of resistive SEI film on electrode surface, thus enabling a rather stable cycling performance.



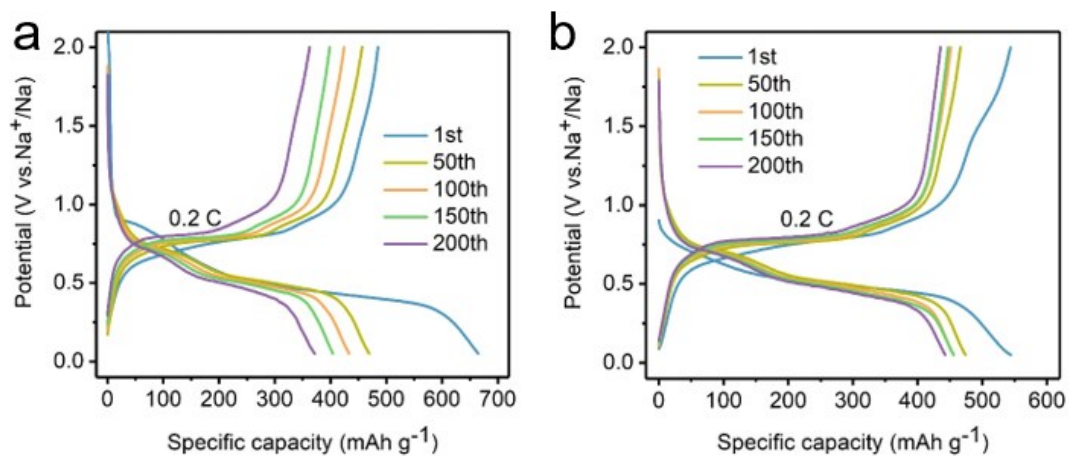

**Fig. S8.** Voltage profiles of Na||Sb cell (a) and Na||Sb-pNa cell (b) at selected cycles during cycling at 0.2 C.

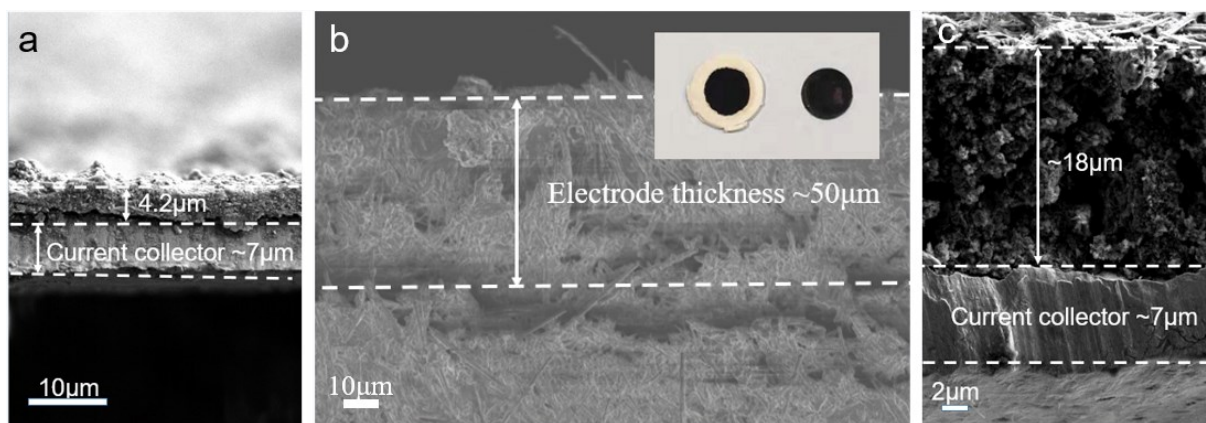

**Fig. S9.** The cross-sectional SEM images of (a) uncycled pristine Sb electrode, (b) pristine Sb electrode after 300 cycles at 4 C and (c) Sb-pNa electrode after 300 cycles at 4 C.

As can be seen from the cross-sectional SEM images of the cycled electrodes in **Fig. S9**, pristine Sb electrode suffers more than tenfold volume expansion from 4.2  $\mu\text{m}$  to 50  $\mu\text{m}$  after 300 cycles, and some Sb particles even peeled off from the current collector. In contrast, the Sb-pNa electrode only expands to 18  $\mu\text{m}$ , and keep tight adhesion to the current collector after 300 cycles.

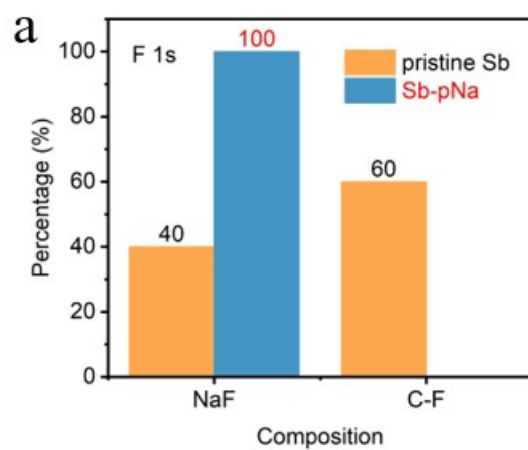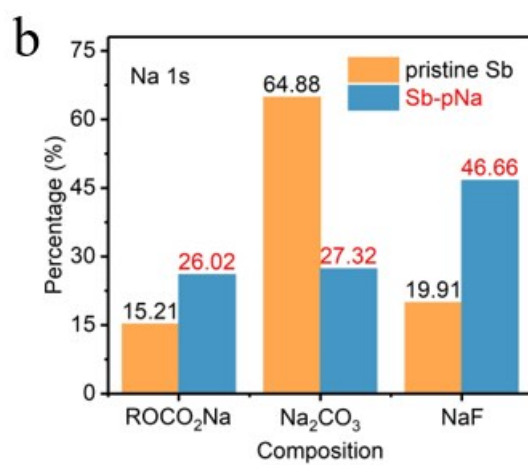

**Fig. S10.** The decomposition products proportion of solvent reduction in F1s (a) and Na1s (b) spectra.

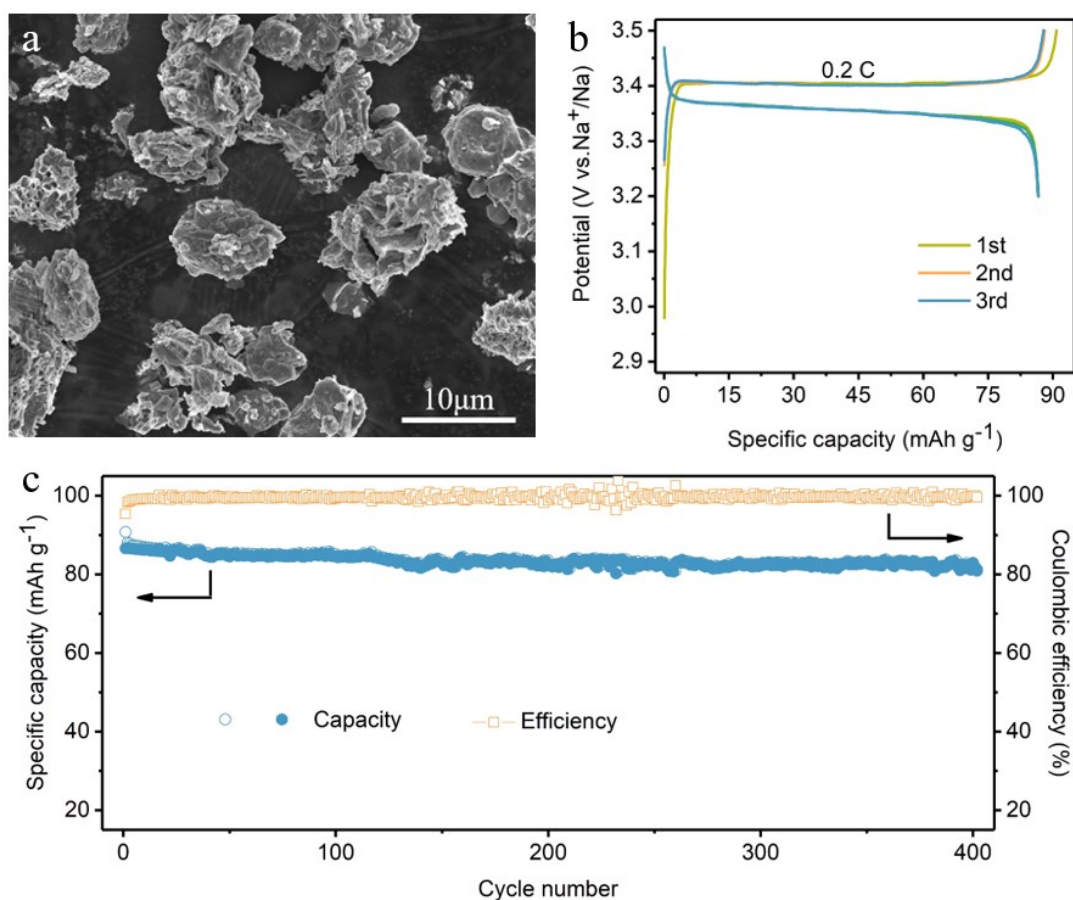

**Fig.S11.** (a)SEM images of  $\text{Na}_2\text{V}_3(\text{PO}_4)_2@\text{C}$  sample. Electrochemical property of  $\text{Na}_2\text{V}_3(\text{PO}_4)_2@\text{C}$  cathode: (b) voltage profiles of the first three cycles at 0.2 C and (c) long cycling performance at 0.2C ( $1\text{C}=120\text{ mA g}^{-1}$ ).

The morphological feature and electrochemical performances of  $\text{Na}_2\text{V}_3(\text{PO}_4)_2$  sample were revealed in **Fig.S11**. As shown in Figure S 9b, the constant current charge-discharge curves appear two obvious voltage plateaus at 3.3/3.4V, corresponding to the reversible redox reaction of  $\text{V}^{3+}/\text{V}^{4+}$  ( $\text{Na}_2\text{V}_3(\text{PO}_4)_2 \leftrightarrow \text{NaV}_3(\text{PO}_4)_2 + \text{Na}^+ + \text{e}^-$ ).<sup>3, 4</sup> In addition, the high capacity retention rate of 96% after 400 cycles indicates the NVP electrode has excellent cycling stability.

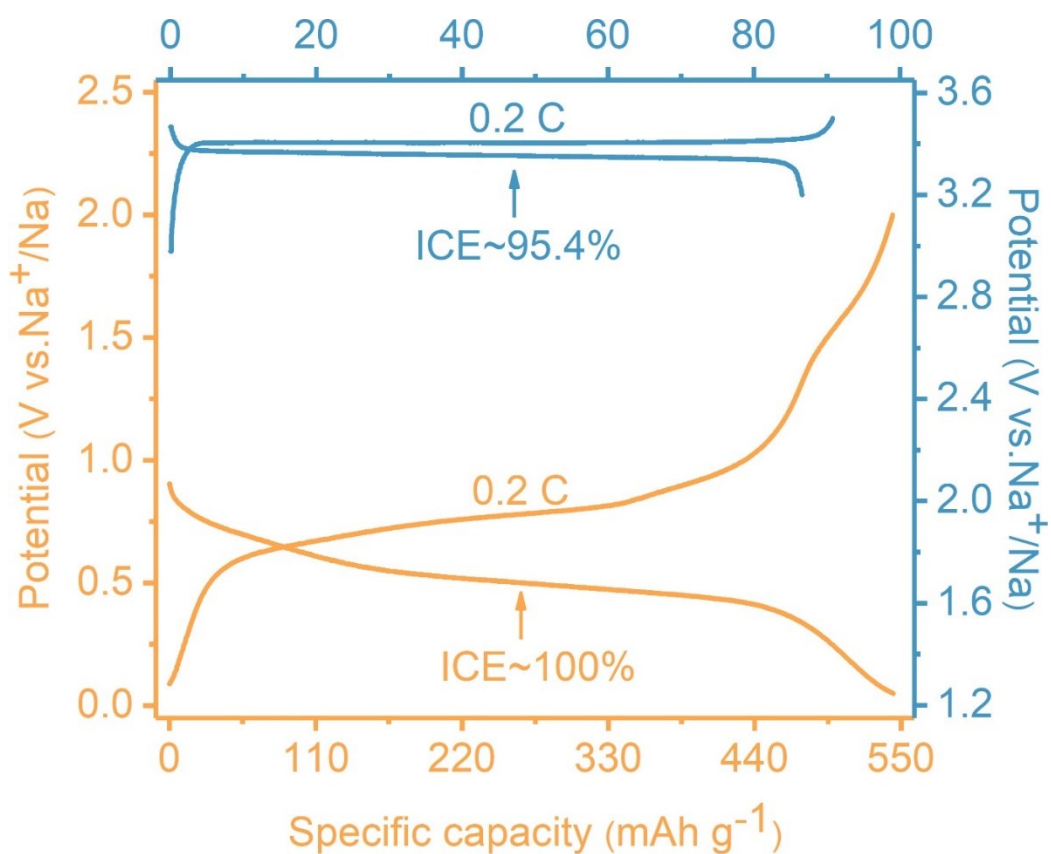

**Fig. S12.** Initial voltage curve of Sb-pNa negative and NVP positive electrodes at 0.2C (1 C=500 mA g<sup>-1</sup>), respectively.

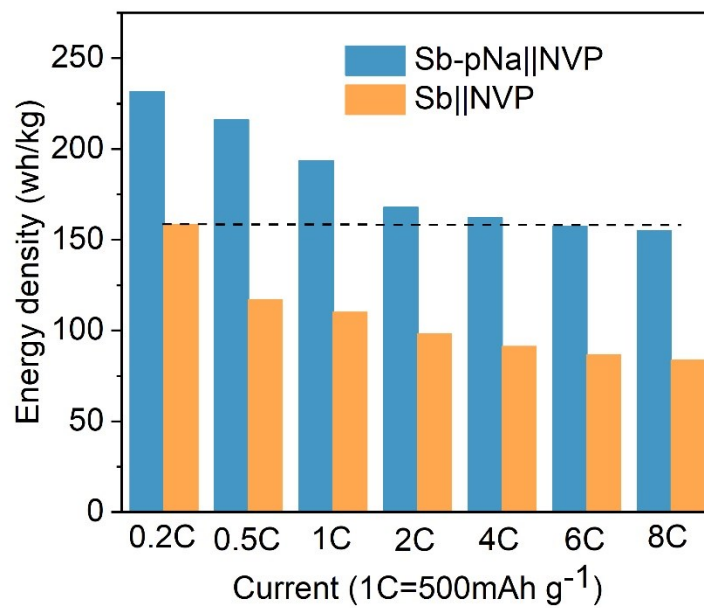

**Fig. S13.** The energy density comparison of both full-cells at 0.2-8 C.

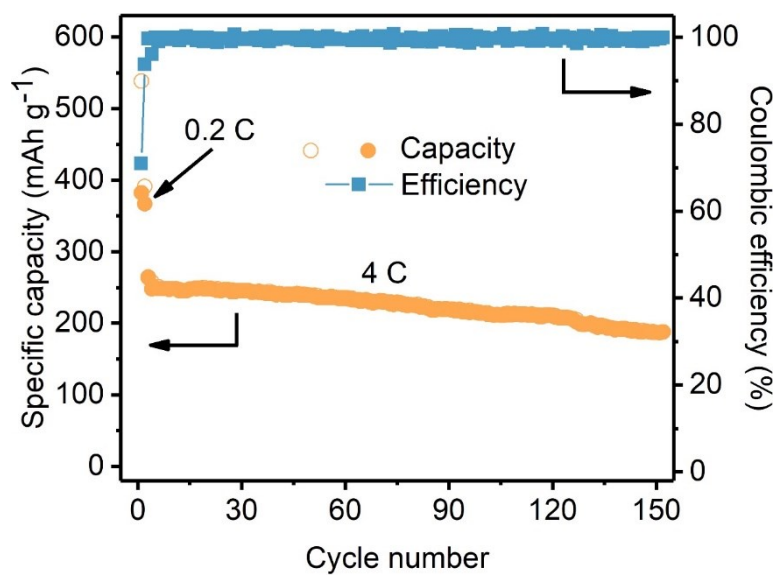

**Fig. S14.** Long cycling performance of Sb||NVP full cell at 4C.

**Tab. S1.** A survey of the initial coulomb efficiency (ICE) of Sb anodes in SIBs.

| Nanostructure                            | ICE (%) | Ref |
|------------------------------------------|---------|-----|
| electrospun nanowire                     | 55%     | 5   |
|                                          | 56%     | 2   |
| hollow Sb@C Yolk-Shell Spheres           | 60.3%   | 6   |
| Yolk-shell structured Sb@C               | 69%     | 7   |
| pomegranate Sb@C yolk-shell microspheres | ~60%    | 8   |
| multi-shell hollow                       | 55      | 9   |
| Nanoporous-antimony                      | ~65%    | 10  |
| Highly uniform Sb nanotubes              | 71%     | 11  |
| Sb@C coaxial nanotubes                   | 50%     | 12  |



**Tab. S2.** Fitted values for the equivalent circuit elements in Fig. 5

|                       | $R_s/(\Omega)$ |        | $R_{SEI}/(\Omega)$ |        | $R_{CT}/(\Omega)$ |        |
|-----------------------|----------------|--------|--------------------|--------|-------------------|--------|
|                       | Sb             | Sb-pNa | Sb                 | Sb-pNa | Sb                | Sb-pNa |
| <b>1<sup>st</sup></b> | 13.09          | 5.18   | 210.7              | 60.87  | 392.8             | 118.5  |
| <b>2<sup>nd</sup></b> | 15.87          | 5.39   | 275.2              | 56.4   | 379.3             | 143.6  |
| <b>3<sup>rd</sup></b> | 12.95          | 5.13   | 217.3              | 47.8   | 402.4             | 135    |
| <b>5<sup>th</sup></b> | 10.8           | 4.88   | 176.3              | 39.5   | 397               | 109.7  |

**Tab. S3.** A survey of the electrochemical properties of sodium ion full cells reported in literatures.

| Cathode-Anode                                                                            | Potential(V) | ICE (%) | Cycle performance  | Energy density (Wh/kg) | Ref.      |
|------------------------------------------------------------------------------------------|--------------|---------|--------------------|------------------------|-----------|
| NVP-Sb                                                                                   | 2.61         | 95.5    | 70%(150 cycles)    | 232                    | This work |
| NVP-Sb                                                                                   | 2.7          | ---     | 74% (100 cycles)   | 205                    | 13        |
| NVPF-Sb                                                                                  | 3.0          | 87.6    | 80% (50 cycles)    | ---                    | 14        |
| NVP-SnS                                                                                  | 2.2          | 72.4    | 85.5% (300 cycles) | 99.8                   | 15        |
| $\text{Na}_{0.8}\text{Li}_{0.12}\text{Ni}_{0.22}\text{Mn}_{0.66}\text{O}_2\text{-SnS}_2$ | 2.5          | 63.6    | 74% (50 cycles)    | 191                    | 16        |
| NVP-AC                                                                                   | 1.7          | ---     | 80% (200 cycles)   | 186                    | 17        |
| NVP-NVP                                                                                  | 1.7          | 77      | 92.2%(100cycles)   | 71.2                   | 18        |
| NVP-graphene                                                                             | 2.7          | 94.3    | 77.1% (200 cycles) | 123                    | 19        |
| NVP-NVP                                                                                  | 1.7          | ---     | 77% (100 cycles)   | 150                    | 20        |
| NVP-NVP                                                                                  | 1.8          | 85      | 81% (280 cycles)   | 162                    | 21        |
| NVP-CPNW                                                                                 | 2.6          | 68.3    | 38%(200 cycles)    | 104                    | 22        |
| NVP-MoS <sub>3</sub>                                                                     | 1.8          | 68.3    | 84%(100 cycles)    | 100.8                  | 23        |
| NVPF-NTP                                                                                 | 1.5          | 70      | 71%(1000 cycles)   | 73                     | 24        |
| NVOF-NTP                                                                                 | 1.7          | ---     | 86%(1800 cycles)   | 45.4                   | 25        |
| NVP-HC                                                                                   | 3.26         | 70.6    | 89.2% (300 cycles) | 143.7                  | 26        |
| $\text{Na}_{0.9}[\text{Cu}_{0.22}\text{Fe}_{0.30}\text{Mn}_{0.48}]\text{O}_2\text{-HC}$  | 3            | 92.9    | 87.6%(20 cycles)   | 240                    | 27        |

## References

1. J. Qian, Y. Chen, L. Wu, Y. Cao, X. Ai and H. Yang, *Chem. Commun.*, 2012, **48**, 7070-7072.
2. L. Wu, X. Hu, J. Qian, F. Pei, F. Wu, R. Mao, X. Ai, H. Yang and Y. Cao, *Energy Environ. Sci.*, 2014, **7**, 323-328.
3. Y. Fang, L. Xiao, X. Ai, Y. Cao and H. Yang, *Adv. Mater.*, 2015, **27**, 5895-5900.
4. Y. Jiang, Z. Z. Yang, W. H. Li, L. C. Zeng, F. S. Pan, M. Wang, X. Wei, G. T. Hu, L. Gu and Y. Yu, *Adv. Energy Mater.*, 2015, **5**, 1402104.
5. Y. Zhu, X. Han, Y. Xu, Y. Liu, S. Zheng, K. Xu, L. Hu and C. Wang, *ACS Nano*, 2013, **7**, 6378-6386.
6. J. Liu, L. Yu, C. Wu, Y. Wen, K. Yin, F. K. Chiang, R. Hu, J. Liu, L. Sun, L. Gu, J. Maier, Y. Yu and M. Zhu, *Nano Lett.*, 2017, **17**, 2034-2042.
7. J. Song, P. Yan, L. Luo, X. Qi, X. Rong, J. Zheng, B. Xiao, S. Feng, C. Wang, Y.-S. Hu, Y. Lin, V. L. Sprenkle and X. Li, *Nano Energy*, 2017, **40**, 504-511.
8. J. Song, D. Xiao, H. Jia, G. Zhu, M. Engelhard, B. Xiao, S. Feng, D. Li, D. Reed, V. L. Sprenkle, Y. Lin and X. Li, *Nanoscale*, 2018, **11**, 348-355.
9. F. Xie, L. Zhang, Q. Gu, D. Chao, M. Jaroniec and S.-Z. Qiao, *Nano Energy*, 2019, **60**, 591-599.
10. Y. Z. Li, K. Yan, H. W. Lee, Z. D. Lu, N. Liu and Y. Cui, *Nat. Energy*, 2016, **1**, 8.
11. Y. Liu, B. Zhou, S. Liu, Q. Ma and W. H. Zhang, *ACS Nano*, 2019, **13**, 5885-5892.
12. Z. M. Liu, X. Y. Yu, X. W. D. Lou and U. Paik, *Energy Environ. Sci.*, 2016, **9**, 2314-2318.
13. H. C. Gao, W. D. Zhou, K. Park and J. B. Goodenough, *Adv. Energy Mater.*, 2016, **6**.
14. J. Z. Guo, P. F. Wang, X. L. Wu, X. H. Zhang, Q. Yan, H. Chen, J. P. Zhang and Y. G. Guo, *Adv. Mater.*, 2017, **29**, 1701968.
15. X. Xiong, C. Yang, G. Wang, Y. Lin, X. Ou, J.-H. Wang, B. Zhao, M. Liu, Z. Lin and K. Huang, *Energy Environ. Sci.*, 2017, **10**, 1757-1763.
16. B. Qu, C. Ma, G. Ji, C. Xu, J. Xu, Y. S. Meng, T. Wang and J. Y. Lee, *Adv. Mater.*, 2014, **26**, 3854-3859.
17. S. Li, Y. Dong, L. Xu, X. Xu, L. He and L. Mai, *Adv. Mater.*, 2014, **26**, 3545-3553.
18. T. F. Hung, W. J. Cheng, W. S. Chang, C. C. Yang, C. C. Shen and Y. L. Kuo, *Chem. Eur. J.*, 2016, **22**, 10620-10626.
19. X. Cao, A. Pan, S. Liu, J. Zhou, S. Li, G. Cao, J. Liu and S. Liang, *Adv. Energy Mater.*, 2017, **7**.
20. C. Zhu, P. Kopold, P. A. van Aken, J. Maier and Y. Yu, *Adv. Mater.*, 2016, **28**, 2409-2416.
21. Y. Zhang, H. Zhao and Y. Du, *J. Mater. Chem. A*, 2016, **4**, 7155-7159.
22. M. P. Fan, Y. Chen, Y. H. Xie, T. Z. Yang, X. W. Shen, N. Xu, H. Y. Yu and C. L. Yan, *Adv. Funct. Mater.*, 2016, **26**, 5019-5027.
23. H. Ye, L. Wang, S. Deng, X. Zeng, K. Nie, P. N. Duchesne, B. Wang, S. Liu, J. Zhou, F. Zhao, N. Han, P. Zhang, J. Zhong, X. Sun, Y. Li, Y. Li and J. Lu, *Adv. Energy Mater.*, 2017, **7**.
24. Q. Liu, X. Meng, Z. Wei, D. Wang, Y. Gao, Y. Wei, F. Du and G. Chen, *ACS Appl. Mater. Interfaces*, 2016, **8**, 31709-31715.
25. P. R. Kumar, Y. H. Jung, J. E. Wang and D. K. Kim, *J. Power Sources*, 2016, **324**, 421-427.
26. X. Jiang, X. Liu, Z. Zeng, L. Xiao, X. Ai, H. Yang and Y. Cao, *iScience*, 2018, **10**, 114-122.
27. X. Liu, Y. Tan, T. Liu, W. Wang, C. Li, J. Lu and Y. Sun, *Adv. Funct. Mater.*, 2019, **29**, 1903795.
